# Supplementary material
Source: PubMed Central journal article supplement (PMC8553567)

**CD146 bound to LCK promotes TCR signaling and anti-tumor immune response in mice**

Hongxia Duan<sup>1,#</sup>, Lin Jing<sup>1,2,#</sup>, Xiaoqing Jiang<sup>1</sup>, Yanbin Ma<sup>1,2</sup>, Daji Wang<sup>1,2</sup>, Jianquan Xiang<sup>1</sup>, Xuehui Chen<sup>1</sup>, Zhenzhen Wu<sup>1</sup>, Huiwen Yan<sup>1</sup>, Junying Jia<sup>3</sup>, Zheng Liu<sup>1</sup>, Jing Feng<sup>1</sup>, Mingzhao Zhu<sup>2,4,\*</sup>, Xiyun Yan<sup>1,2,5,\*</sup>

<sup>1</sup>Key Laboratory of Protein and Peptide Pharmaceutical, Institute of Biophysics, Chinese Academy of Sciences, Beijing 100101, China

<sup>2</sup> College of Life Sciences, University of Chinese Academy of Sciences, Beijing 100049, China

<sup>3</sup> Core Facility for Protein Research, Institute of Biophysics, Chinese Academy of Sciences, Beijing 100101, China

<sup>4</sup> Key Laboratory of Infection and Immunity, Institute of Biophysics, Chinese Academy of Sciences, Beijing 100101, China

<sup>5</sup> Joint Laboratory of Nanozymes in Zhengzhou University, School of Basic Medical Sciences, Zhengzhou University, Zhengzhou 450001, China.

#These authors contributed equally to this work.

\*Correspondence:

Mingzhao Zhu, E-mail: zhumz@ibp.ac.cn, Tel.: +86 10 64888775. Fax: +86 10 64871293;

Xiyun Yan, E-mail: yanxy@ibp.ac.cn, Tel.: +86 10 64888583. Fax: +86 10 64888584.

Running title: CD146 mediates TCR signaling by binding to LCK

Key words: CD146, LCK activation, TCR signaling, T cell activation

## Supplementary Figures

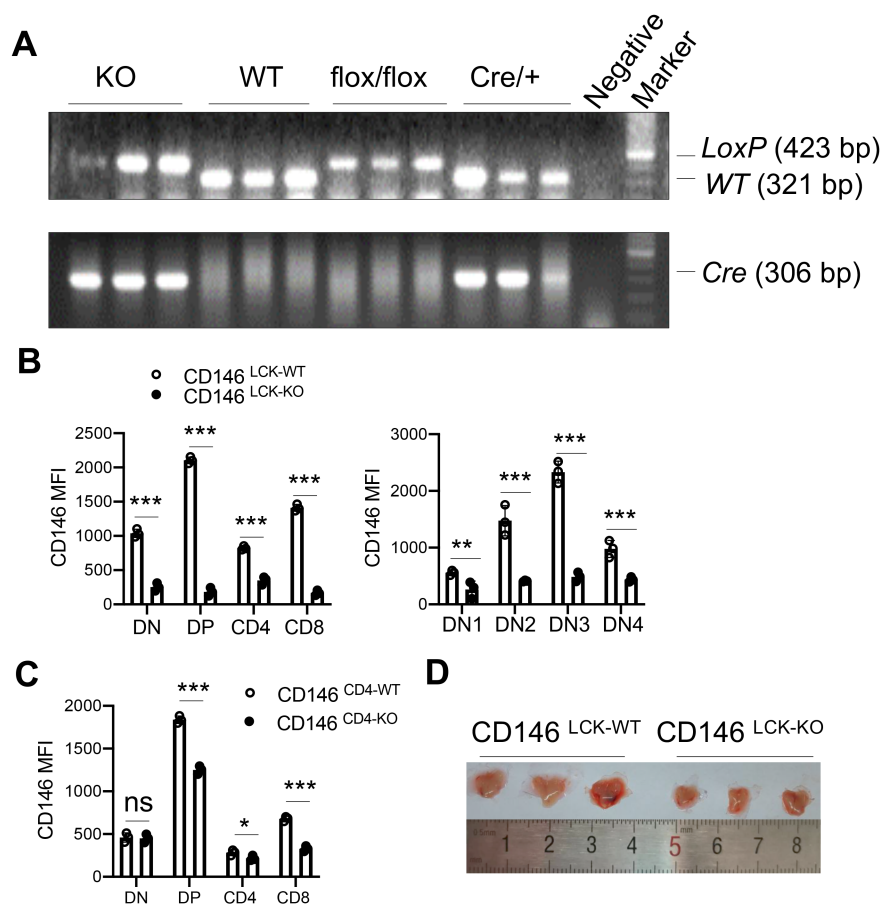

**Supplementary Fig 1. Analysis of CD146 conditional knockout mice. (A)** PCR analysis of genotypes of mice (representative of  $n = 3$ ). **(B, C)** MFI of CD146 on DN1-DN4, DP, CD4, and CD8 subpopulations of thymocytes from conditional knockout mice ( $n = 3$ ). **(D)** Thymuses from WT mice and conditional knockout mice (representative of  $n = 3$ ). Each symbol represents an individual mouse. One-way ANOVA followed by Bonferroni's correction was performed. Data are shown as mean  $\pm$  SEM. \* $p < 0.05$ , \*\* $p < 0.01$ .

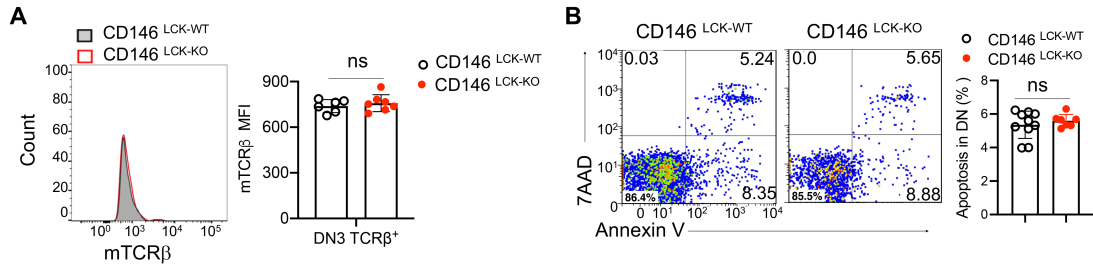

**Supplementary Fig. 2. CD146 is required for  $\beta$  selection.** (A) Surface staining of membrane TCR $\beta$  (m TCR $\beta$ ) in DN3 cells. Right, mTCR $\beta$  MFI in DN3 TCR $\beta^+$  cells (n = 6 for WT or 7 for KO). (B) Apoptosis of DN cells from CD146<sup>LCK-WT</sup> and CD146<sup>LCK-KO</sup> mice. Right, percentages of apoptosis (n = 10 for WT or 7 for KO). Each symbol represents an individual mouse. Two-tailed *t*-test was performed. n.s, not significant.

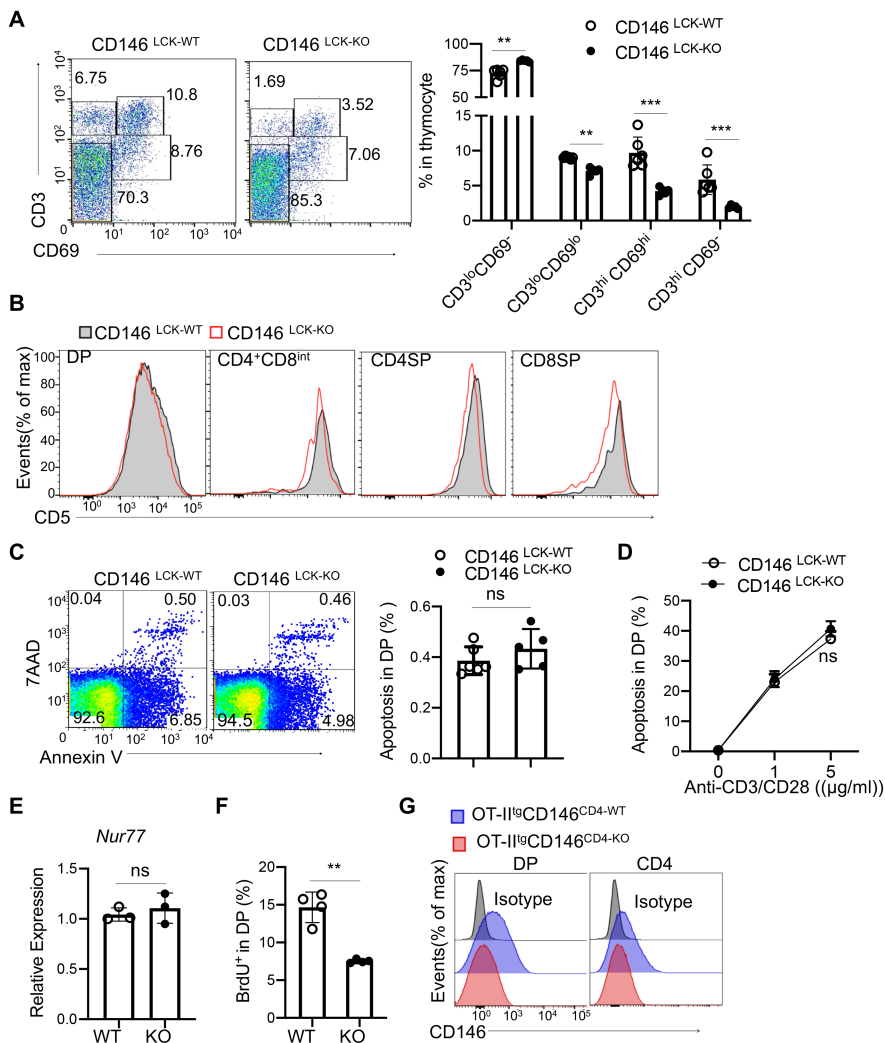

**Supplementary Fig 3. CD146 is required for positive selection.** (A) Surface staining of CD3 and CD69 on thymocytes (Left) from CD146<sup>LCK-WT</sup> and CD146<sup>LCK-KO</sup> mice; numbers adjacent to outlined areas indicate percent cells in each gate. Right, percentages of CD3<sup>lo</sup>CD69<sup>-</sup>, CD3<sup>lo</sup>CD69<sup>lo</sup>, CD3<sup>hi</sup>CD69<sup>-</sup>, and CD3<sup>hi</sup>CD69<sup>hi</sup> subpopulations in 10 thymuses (n = 10). (B) Surface staining of CD5 from gated CD4<sup>+</sup>CD8<sup>int</sup>, DP, and SP cells of CD146<sup>LCK-WT</sup> and CD146<sup>LCK-KO</sup> mice (representative of n = 3). (C) Analysis of apoptosis in DP cells from CD146<sup>LCK-WT</sup> and CD146<sup>LCK-KO</sup> mice. Right, percentages of apoptosis (n = 6 for WT or 5 for KO). (D) Analysis of apoptosis in isolated DP cells from CD146<sup>LCK-WT</sup> and CD146<sup>LCK-KO</sup> mice stimulated with the indicated concentration of anti-CD3/CD28 antibodies for 20 h (n = 3). (E) Relative expression of Nur77 mRNA in thymocytes from WT and KO mice (n = 3). (F) Percentages of BrdU<sup>+</sup> cells in DP from WT and KO mice (n = 4). (G) Surface staining of CD146 in DP and CD4 thymocytes from OT-II<sup>tg</sup>CD146<sup>CD4-WT</sup> and OT-II<sup>tg</sup>CD146<sup>CD4-KO</sup> mice (representative of n = 3). Each symbol represents an individual mouse. One-way ANOVA followed by Bonferroni's correction (A) or two-tailed *t*-test (C, E, and F) or two-way ANOVA with multiple-comparison test (D) were performed. Data are shown as mean ± SEM; \*\*p<0.01, \*\*\*p<0.001, n.s, not significant.



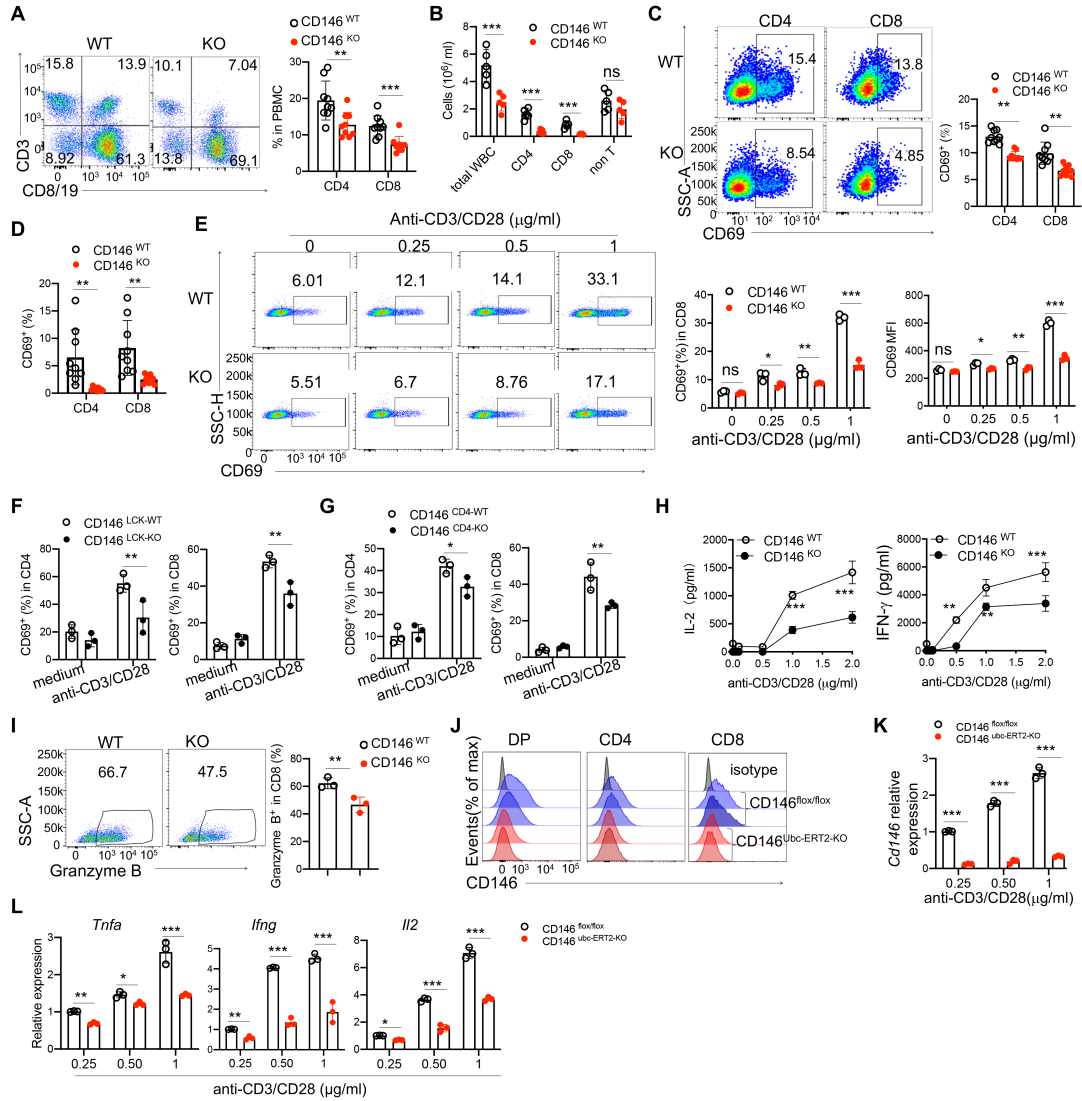

**Supplementary Fig. 4. Impaired TCR-mediated response in CD146-deficient T cells.** (A) Surface staining (left) of CD3 and CD8, CD19 on peripheral blood mononuclear cells (PBMC) from CD146<sup>WT</sup> and CD146<sup>KO</sup> mice. Numbers in the outlined areas indicate the percentages of each gate. Right panel, the percent of CD4 and CD8 populations in PBMC from CD146<sup>WT</sup> and CD146<sup>KO</sup> mice (n = 11). (B) Cell numbers of total PBMCs, CD4 and CD8 T cells, and non-T cells from WT and KO mice (n = 5). (C) CD69 expression on lymphoid CD4 and CD8 cells. Right, percent of CD69<sup>+</sup> cells (n = 9). (D) Quantification of CD69<sup>+</sup> cells in peripheral blood CD4 or CD8 cells from CD146<sup>WT</sup> and CD146<sup>KO</sup> mice (n = 9). (E) CD69 expression on naïve CD8<sup>+</sup> T cells left stimulated for 5 h. Right top panel, quantification of CD69<sup>+</sup> cells. Right bottom panel, quantification of CD69 MFI (n = 3). (F–G) Quantification of CD69<sup>+</sup> cells in isolated CD4 or CD8 cells from CD146<sup>WT</sup> and CD146<sup>LCK-KO</sup> (F) or CD146<sup>CD4-KO</sup> (G) splenic cells left unstimulated or activated with plate-bound anti-CD3/CD28 for 5 h (n = 3). (H) ELISA analysis of IL-2 or IFN- $\gamma$  levels in culture supernatant of splenic naïve T cells after stimulation for 3d in vitro (n = 3). (I) FACS analysis of Granzyme B in CD8 T cells under anti-CD3/CD28 stimulation for 72 h (n = 3). (J) FACS analysis of CD146 expression on thymocyte DP, CD4, and CD8 cells (representative of n = 3).

**(K–L)** Analysis of genes of *Cd146* (**K**), *Tnfa*, *Ifng* and *Il2* (**L**) in tamoxifen-treated splenic naïve T cells after stimulation for 24h. Each symbol represents an individual mouse. One-way ANOVA followed by Bonferroni's correction (**A–F**, **K**, **L**) or two-tailed *t*-test (**I**) were performed. Data are shown as mean ± SEM; \**p* < 0.05, \*\**p* < 0.01, \*\*\**p* < 0.001.

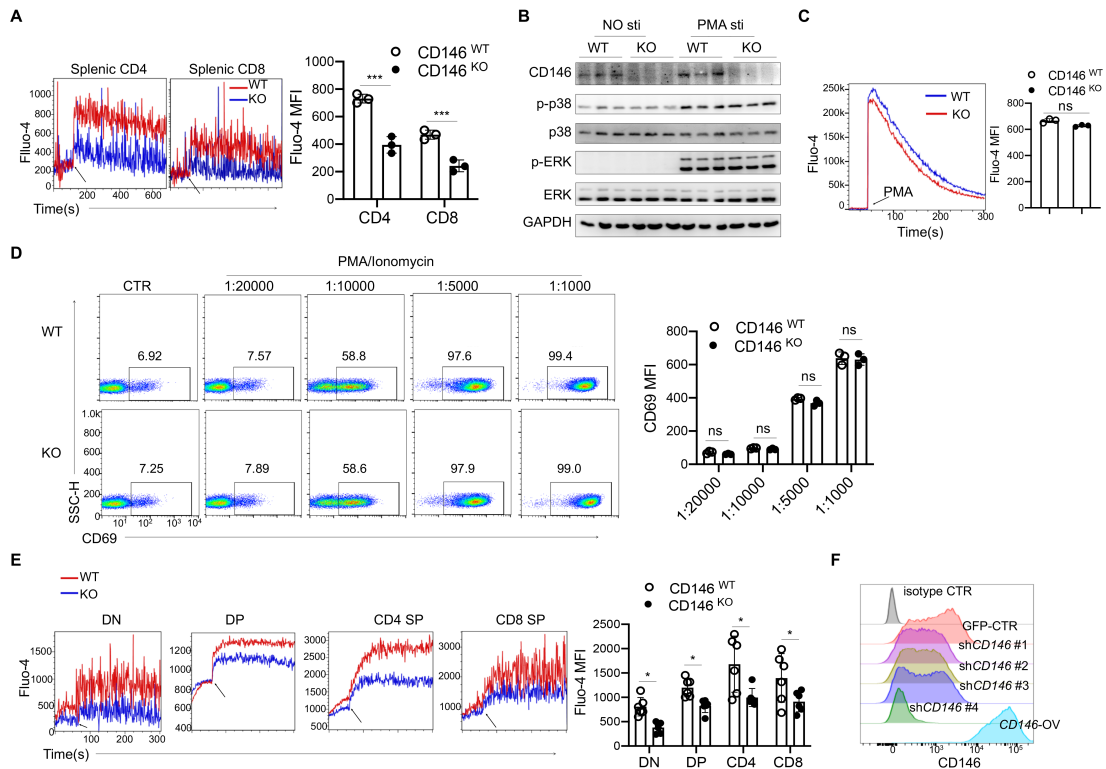

**Supplementary Fig. 5. Interruption of TCR signaling in CD146-deficient mice. (A)** Calcium flux analysis in CD146<sup>WT</sup> and CD146<sup>KO</sup> splenic T cells stimulated with anti-CD3 and anti-CD28 antibodies. Arrows indicate the time of adding antibodies. Right, the quantification of MFI of Fluo-4 in CD4 and CD8 T cells (n = 3). **(B)** Immunoblot analysis of CD146, p-p38, and p-ERK in thymocytes stimulated with PMA/ionomycin for 5 min (representative of n = 3). Total p38, ERK1/2, and ACTIN served as loading controls. **(C)** Calcium flux analysis in CD146<sup>WT</sup> and CD146<sup>KO</sup> thymocytes stimulated with PMA/ionomycin. Arrows indicate when PMA/ionomycin was added. Right, the quantification of MFI of Fluo-4 (n = 3). **(D)** Surface staining of CD69 on isolated CD146<sup>WT</sup> and CD146<sup>KO</sup> splenic T cells stimulated with PMA/ionomycin at the indicated concentrations for 5 h. Right panel, the percentage quantification of CD69 MFI (n = 3). **(E)** Calcium flux analysis in CD146<sup>WT</sup> and CD146<sup>KO</sup> thymocytes stimulated with anti-CD3 antibody. Arrows indicate the time of adding antibody. Right, the quantification of MFI of Fluo-4 in DN, DP, CD4 SP and CD8 SP T cells (n = 6). **(F)** FACS analysis of CD146 expression on Jurkat cells after transfection of *CD146* shRNA or *CD146* plasmid (representative of n = 3). Each symbol represents an individual mouse. One-way ANOVA followed by Bonferroni's correction (**A**, **D**, and **E**) or two-tailed *t*-test (**C**) were performed. Data are shown as mean ± SEM; \**p* < 0.05, \*\*\**p* < 0.001.

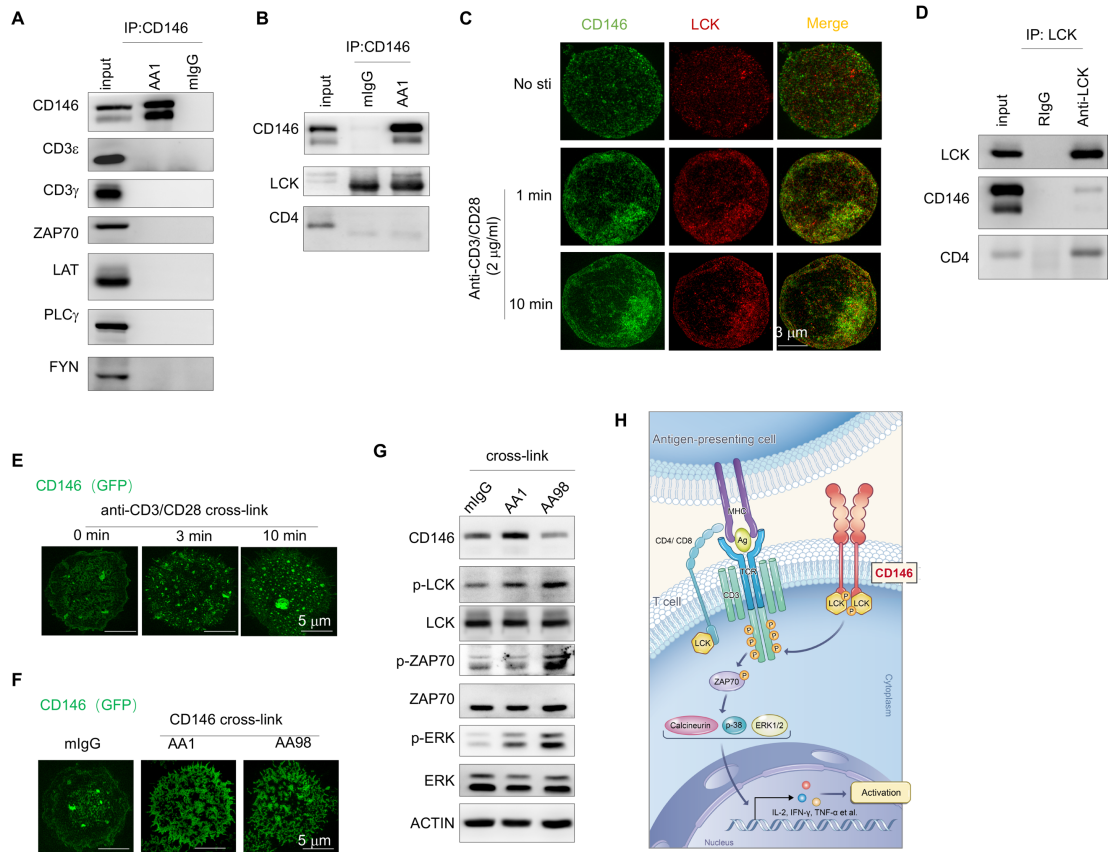

**Supplementary Fig 6. CD146 interacts with LCK and acts as a platform to promote LCK activation.** (A, B) Immunoblot analysis (IB) of CD146, CD3 $\epsilon$ , CD3 $\gamma$ , ZAP70, LAT, PLC $\gamma$ , FYN, LCK, and CD4 in Jurkat cells immunoprecipitated (IP) with anti-CD146 (AA1) or isotype IgG. (C) 3D-SIM (three-dimensional structured illumination microscopy) analysis of CD146 and LCK in Jurkat cells left unstimulated or stimulated with anti-CD3/CD28 antibodies for 1–10 min. (D) IB of LCK, CD146, and CD4 in Jurkat cells immunoprecipitated (IP) with anti-LCK. (E, F) Super-resolution imaging analysis of CD146-GFP in Jurkat cells cross-linked by anti-CD3/CD28 (E) or by anti-CD146 AA1 or AA98 (F). (G) IB of CD146, p-LCK (394), p-ZAP70, and p-ERK1/2 in Jurkat cells cross-linked by anti-CD146 antibodies AA1 or AA98 or control mIgG for 10 min. Total LCK, ZAP70, ERK1/2,  $\beta$  ACTIN or GAPDH served as the loading control. (H) Proposed model for the role of CD146 in TCR signaling. Upon TCR engagement, CD146 is recruited as a membrane component of TCR complex and dimerized. Dimerized CD146 promotes LCK activation, thus exerting a positive regulation on T cell activation. Data are representatives of three independent experiments.

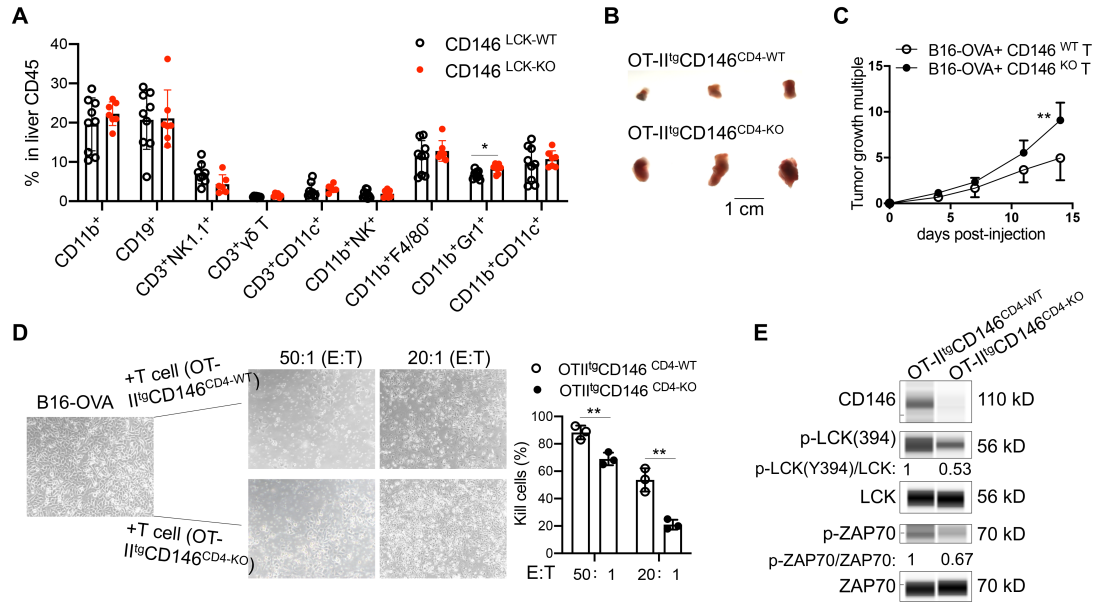

**Supplementary Fig. 7. CD146 on T cells enhances anti-tumor activity.** (A) Percentage of infiltrated immune cells in liver CD45<sup>+</sup> cells from DEN-induced HCC mice (n = 9 for WT or 7 for KO). (B) General view of B16-OVA tumors from OTII<sup>tg</sup>CD146<sup>CD4-WT</sup> or OTII<sup>tg</sup>CD146<sup>CD4-KO</sup> mice (representative of n = 3). (C) B16-OVA tumor growth in nude mice co-injected subcutaneously with B16-OVA cells and T cells (n = 5). (D) T cell-mediated tumor killing in vitro. E:T: T cells: tumor cells (n = 3). (E) Western immunoblot analysis of CD146, p-LCK (394), LCK, p-ZAP70 (319), and ZAP70 in splenic T cells isolated from tumor-bearing mice. Total LCK and ZAP70 proteins were included as loading controls (representative of n = 3). Each symbol represents an individual mouse (A) or one experiment (D). One-way ANOVA followed by Bonferroni's correction (A and D) or 2-way ANOVA with multiple-comparison test (C) were performed. Data are shown as mean ± SEM; \*p < 0.05, \*\*p < 0.01.

**Table S1 CD146 shRNA used in Jurkat cell line for knockdown CD146.**

| Name                  | Sequences           | Respective cDNA locations |
|-----------------------|---------------------|---------------------------|
| <b>CTR shRNA</b>      | Non-effective shRNA | Nonsense sequence         |
| <b>CD146 shRNA #1</b> | ATTCCTCAAGTCATCTGGT | 506–524 bp (190–196 aa)   |
| <b>CD146 shRNA #2</b> | GTTGAATCTGTCTTGTGAA | 1299–1318 bp (454–460 aa) |
| <b>CD146 shRNA #3</b> | TGGCATTCAAGGAGAGGAA | 1342–1360 bp (468–474 aa) |
| <b>CD146 shRNA #4</b> | GCTGGTTAAAGAAGACAAA | 634–652 bp (231–237 aa)   |

**Table S2 Primers used in this study**

| Gene name               | Forward                 | Reverse                 |
|-------------------------|-------------------------|-------------------------|
| <b><i>Mcam-LoxP</i></b> | TGAAGTTCGGCTCAGGACAGAG  | TGGGTCCTGAGAGCTTGGTG    |
| <b><i>Cre</i></b>       | CGATGCAACGAGTGATGAGG    | CGCATAACCAGTGAAACAGC    |
| <b><i>Cd146</i></b>     | AGTCCTCACACCAGAGCCAA    | CTCTTACGAGTCGGGGGCA     |
| <b><i>Il2</i></b>       | AGCATCATCTCAACAAGCCCT   | AGCCCTTGGGGCTTACAAAA    |
| <b><i>Cd69</i></b>      | AGGCTTGTACGAGAAGTTGGA   | AGTTCACCAGAATATCGCTTCAG |
| <b><i>Tnfa</i></b>      | CCCAGGGACCTCTCTCTAATCA  | AGCTGCCCTCAGCTTGAG      |
| <b><i>Ifng</i></b>      | ACGCTACACACTGCATCTTG    | GTCACCATCCTTTTGCCAGTTC  |
| <b><i>Nur77</i></b>     | ATCCAAGTACAACGCACAGTACA | GCTTGGGTTTTGAAGGTAGCC   |
| <b><i>Rpl13a</i></b>    | GAGGTCGGGTGGAAGTACCA    | TGCATCTTGGCCTTTTCCT     |

**Full unedited gel for Figure 6A**

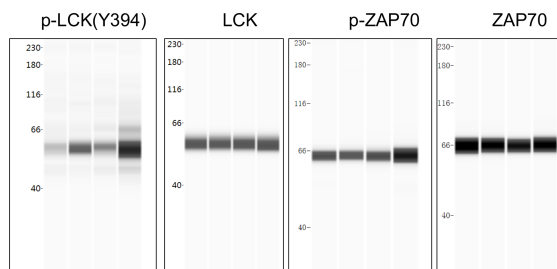

**Full unedited gel for Figure 6E**

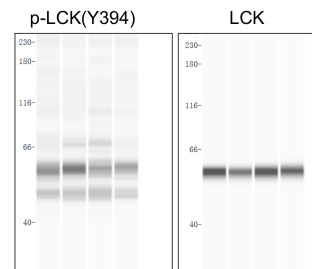

**Full unedited gel for Figure 6D**

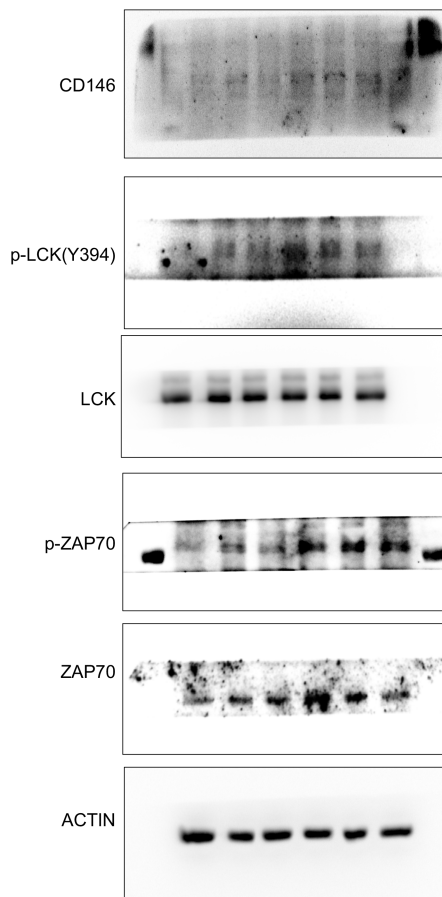

**Full unedited gel for Figure 6G**

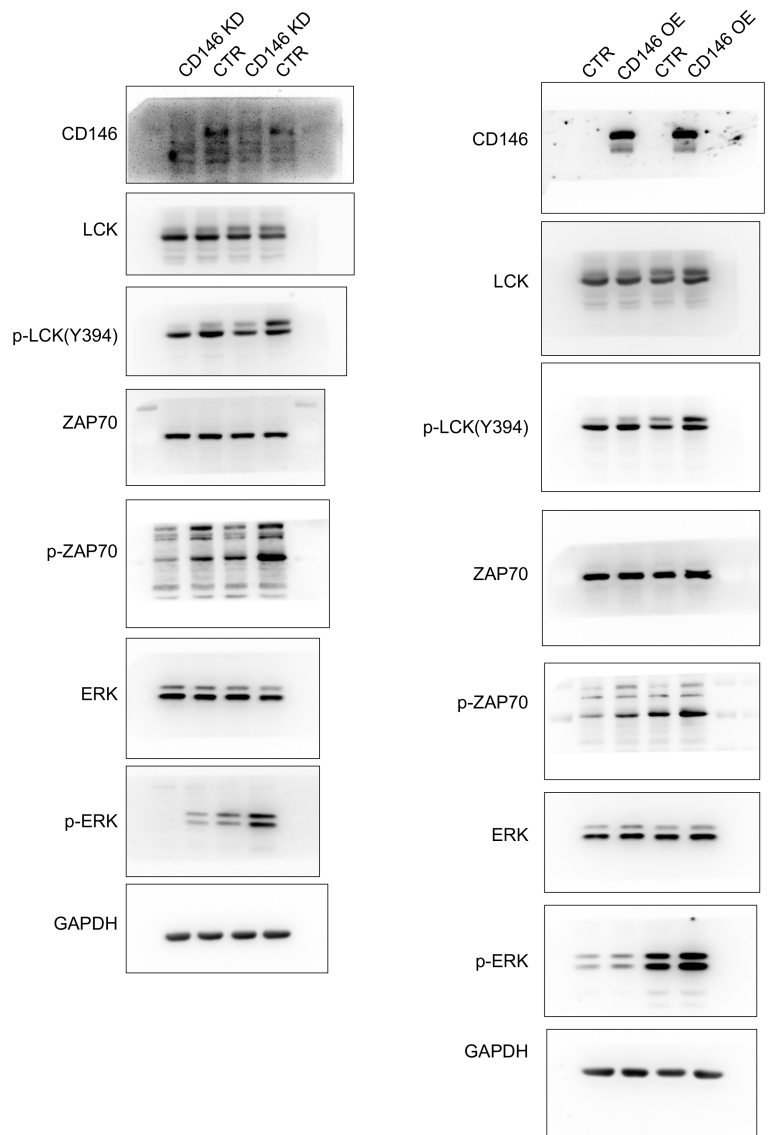

**Full unedited gel for Figure 7A**

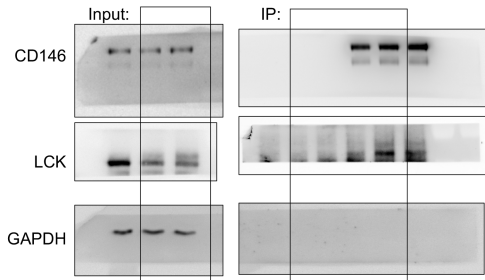

**Full unedited gel for Figure 7C**

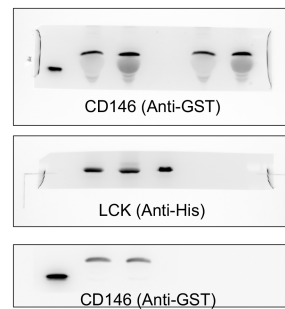

**Full unedited gel for Figure 7E**

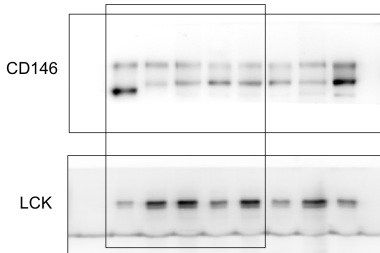

**Full unedited gel for Figure 7H**

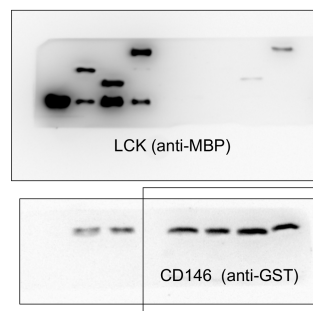

**Full unedited gel for Figure 7I**

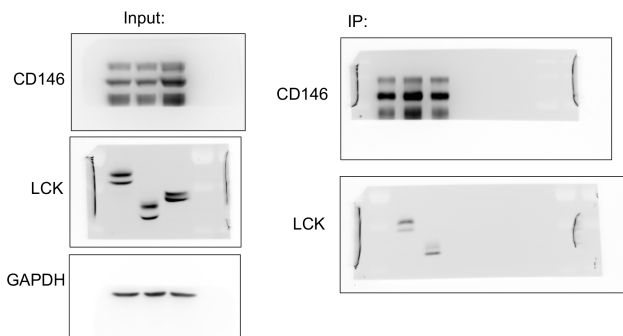

**Full unedited gel for Figure 7J**

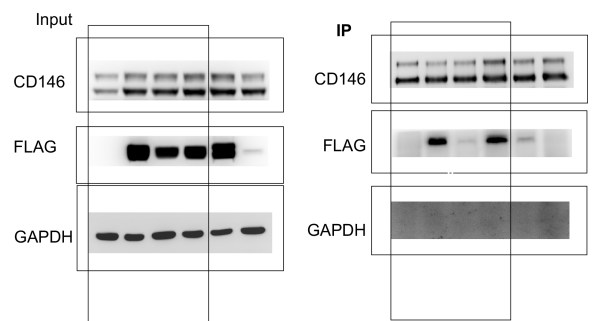

**Full unedited gel for Figure 7K**

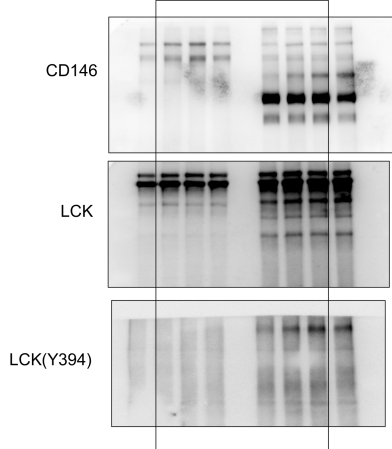

**Full unedited gel for Figure 7N**

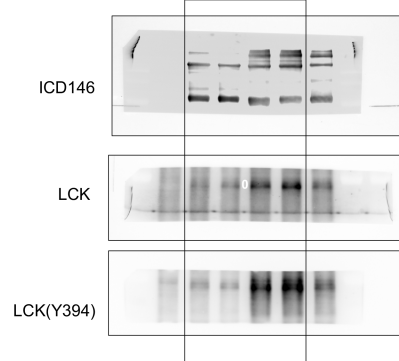



Full unedited gel for Sup Figure 5B

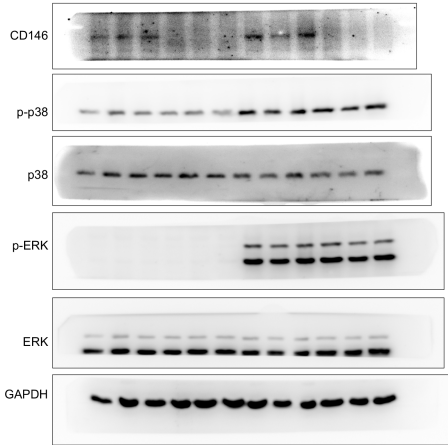

Full unedited gel for Sup Figure 6 A

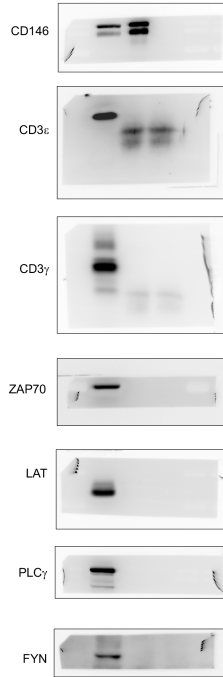

Full unedited gel for Sup Figure 6 B

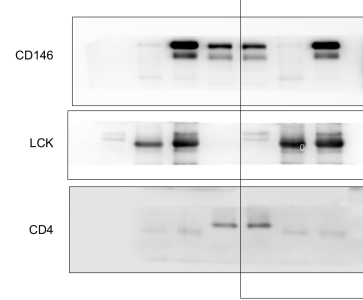

Full unedited gel for Sup Figure 6 D

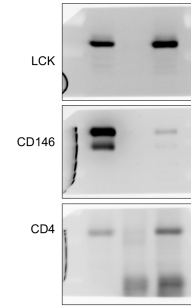

Full unedited gel for Sup Figure 6 G

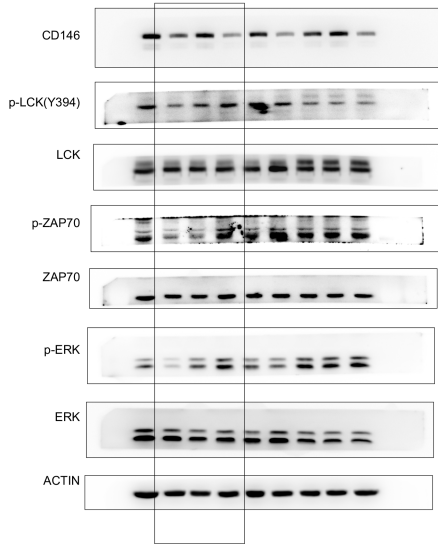

Full unedited gel for Sup Figure 7E

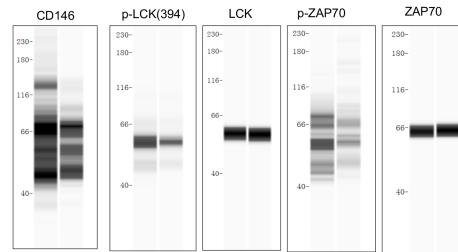

Supplement: jci-131-148568-s009.pdf [file jci-131-148568-s009.pdf]
